# Supplementary material for: Assembly of gold nanoparticles on graphene film via electroless deposition: spontaneous reduction of Au3+ ions by graphene film
Source: Royal Society of Chemistry journal article supplement (doi:10.1039/c4ra11848k), 2014-12-10
Supplement: c4ra11848k1.pdf [file c4ra11848k1.pdf]

## **Assembly of Gold Nanoparticles on Graphene Film via Electroless**

### **Deposition: Spontaneous Reduction of Au<sup>3+</sup> Ions by Graphene Film**

**M. Amal Raj and S. Abraham John\***

Centre for Nanoscience and Nanotechnology  
Department of Chemistry, Gandhigram Rural Institute  
Gandhigram-624 302, Dindigul, Tamilnadu, India

---

\*Corresponding author: Tel: +91 451 245 2371 ; Fax : + 91 451 245 3031

E-mail : [abrajohn@yahoo.co.in](mailto:abrajohn@yahoo.co.in)

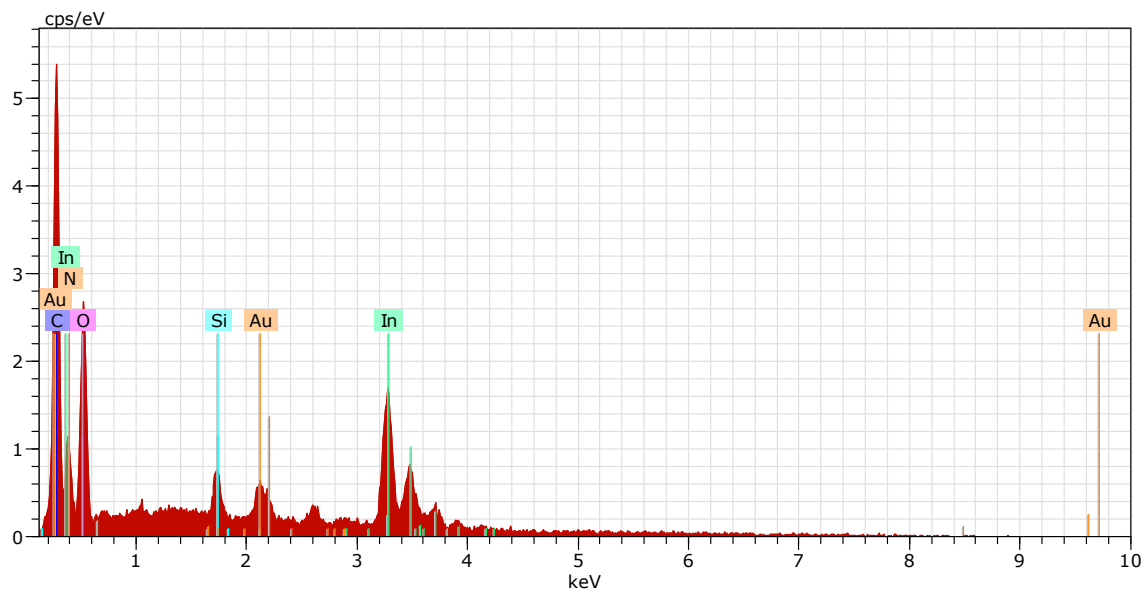

**Figure S1.** EDAX spectrum obtained for ERGO modified ITO substrates after immersing into a solution of  $\text{HAuCl}_4$  solution for 30 min.

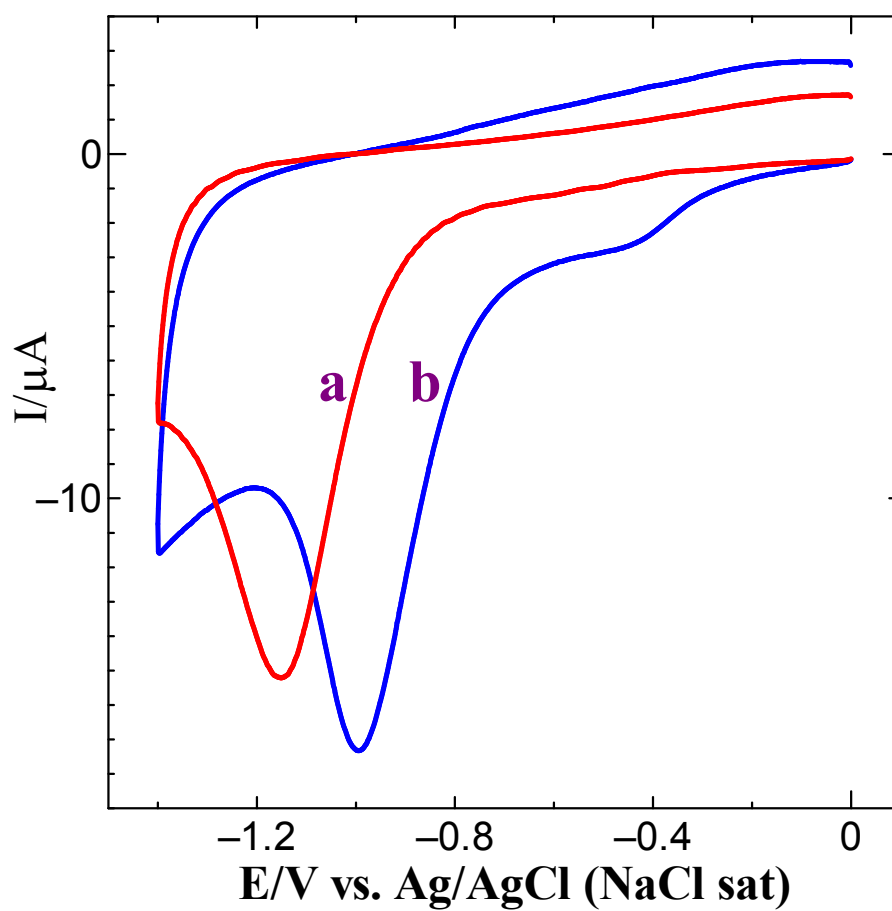

**Figure S2.** Electrochemical reduction of (a) GC/HDA/GO and (b) GC/HDA/GO/AuNPs electrodes (electroless deposition time = 30 min) in 0.2 M PB solution (pH 7).

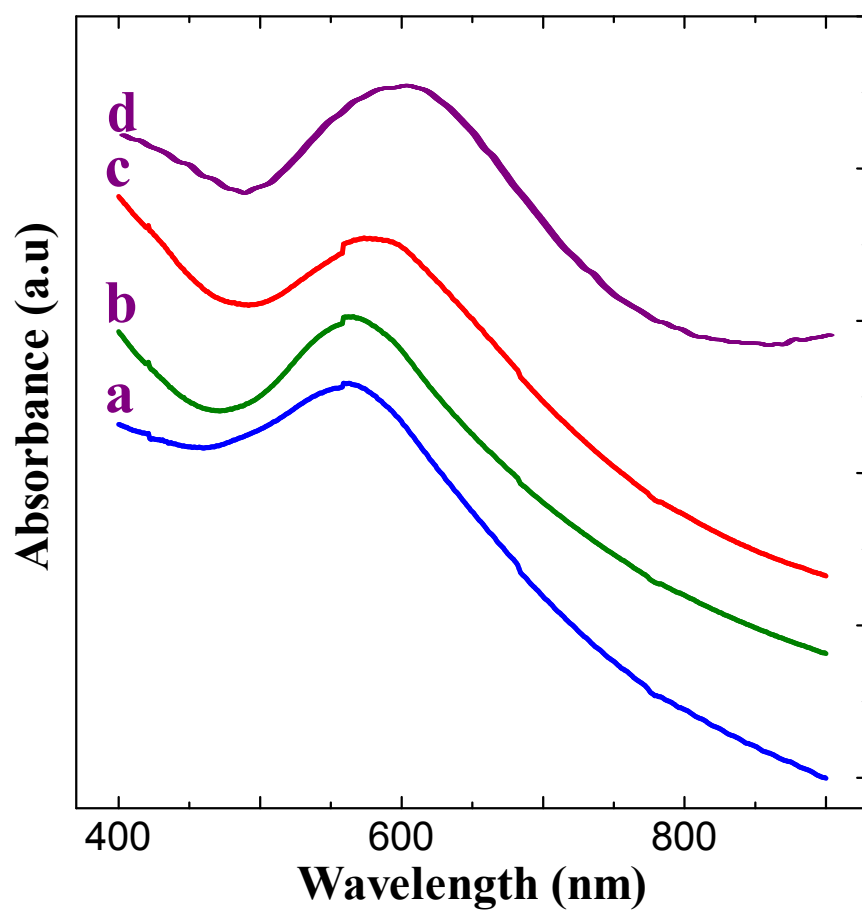

**Figure S3.** UV-visible spectra obtained for AuNPs deposited ERGO films prepared with (a) 30 min, (b) 1 h, (c) 2 h and (d) 3 h electroless deposition.

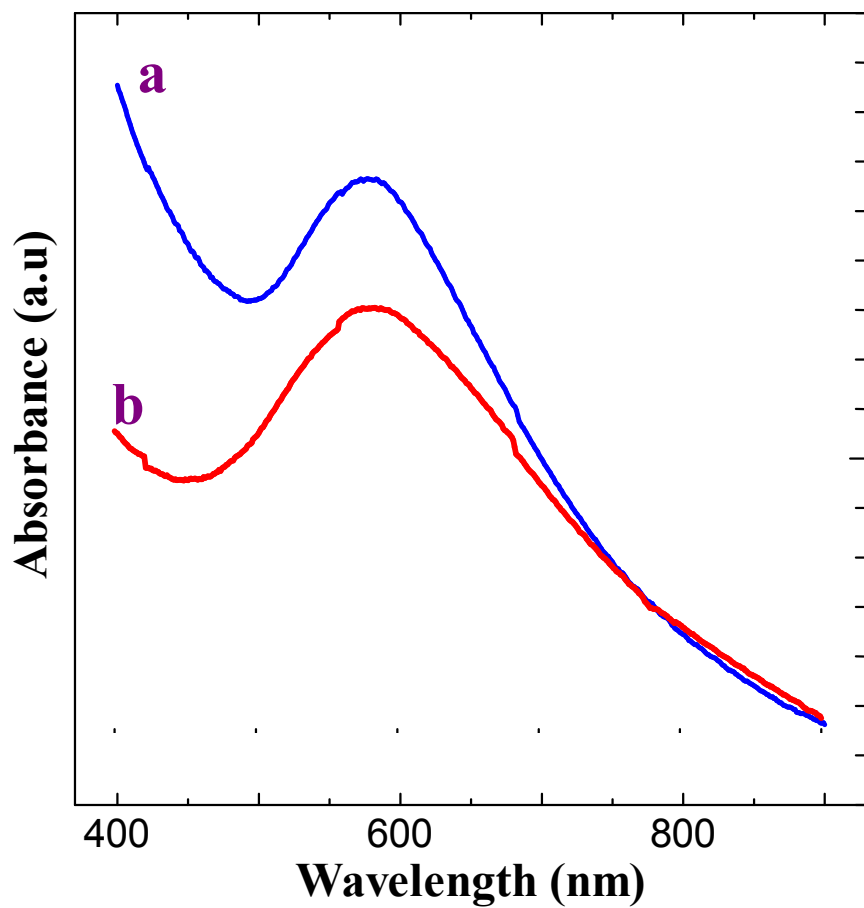

**Figure S4.** UV-visible spectra obtained for AuNPs deposited on GO modified ITO substrate prepared with an electroless deposition time of 1 h (a) before and (b) after electrochemical reduction in 0.2 M PB solution (pH 7.2).

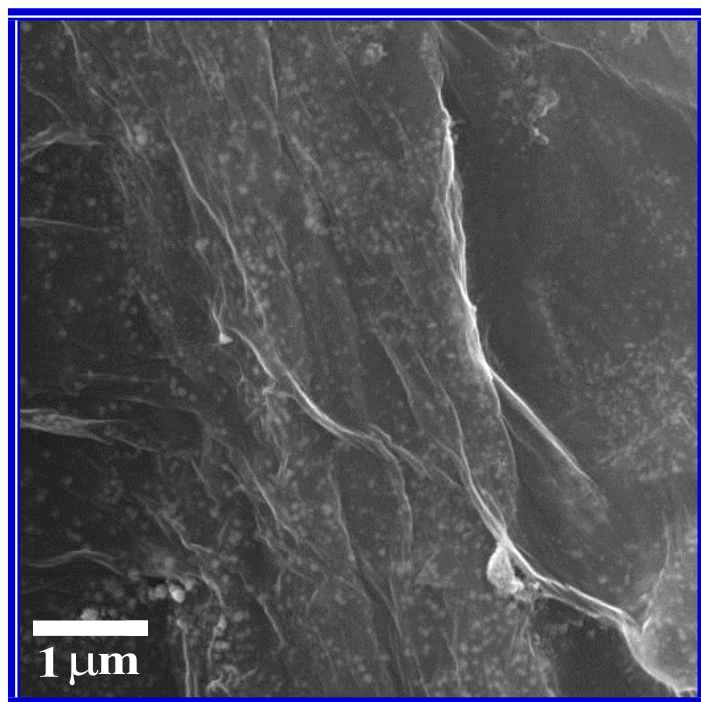

**Figure S5.** SEM image obtained for AuNPs deposited GO modified ITO substrate after electrochemical reduction.

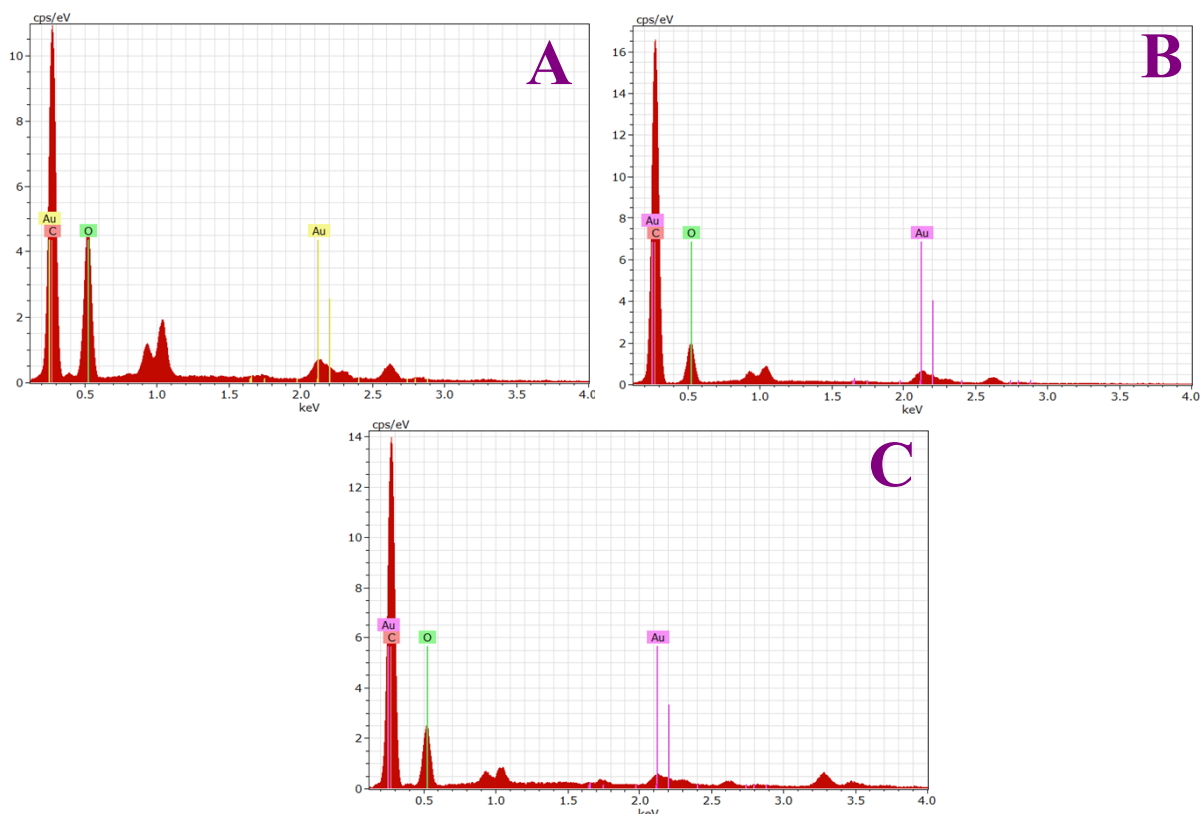

**Figure S6.** EDX spectra obtained for (A) ITO/HDA/GO/AuNPs, (B) ITO/HDA/GO-ERGO/AuNPs and (C) ITO/HDA/ERGO/AuNPs substrates prepared with an electroless deposition time of 1 h.

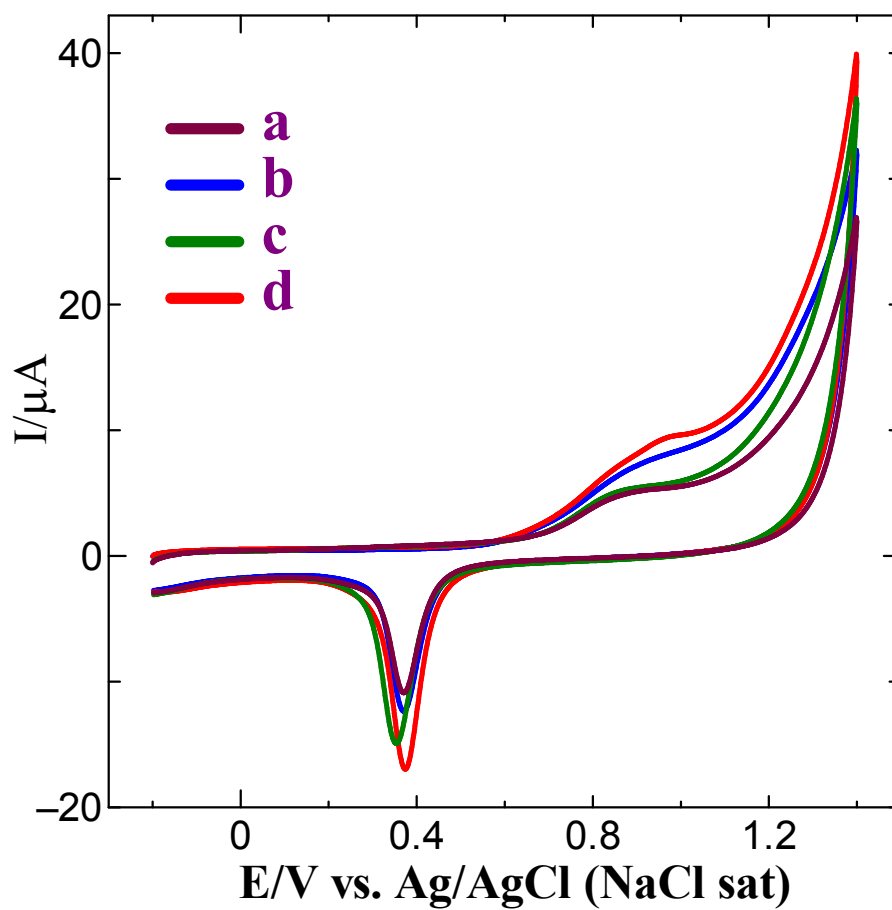

**Figure S7.** CVs obtained for GC/HDA/ERGO/AuNPs electrode prepared with electroless deposition time of (a) 30 min, (b) 1 h, (c) 2 h and (d) 3 h in 0.2 M PB solution (pH 7.2).



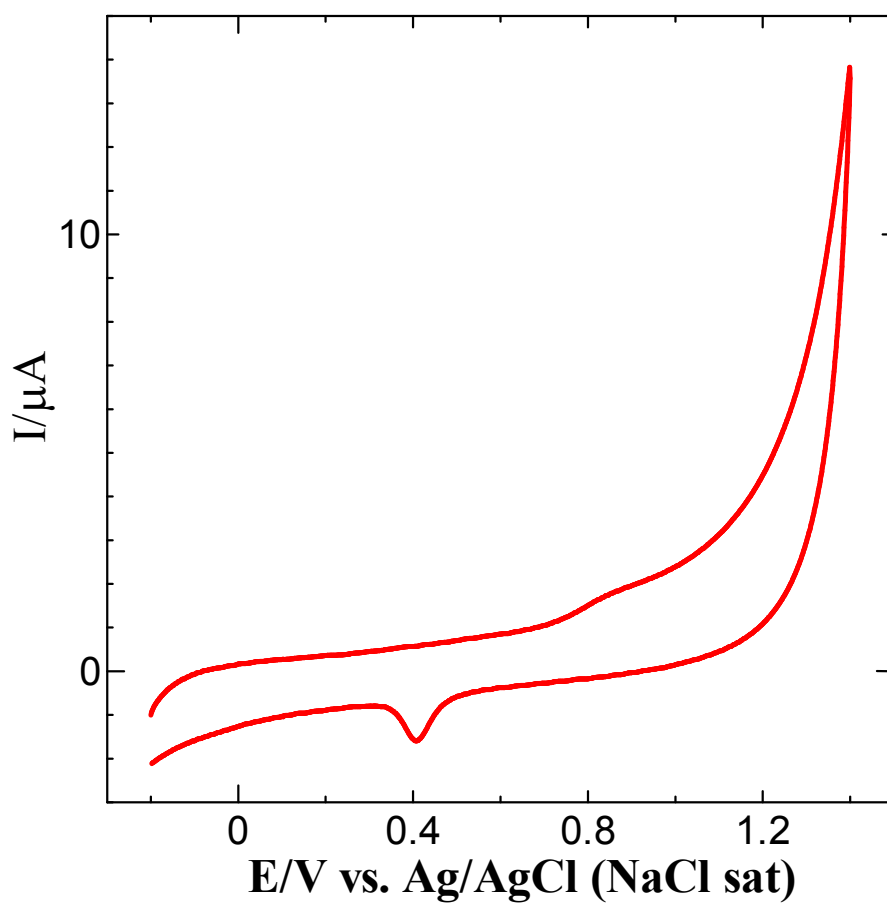

**Figure S8.** CV obtained for ERGO modified GCE after immersing into 0.3 mM  $\text{HAuCl}_4$  solution for 30 min in 0.2 M PB solution.
